# Supplementary material
Source: publisher figshare collection journal article supplement (https://diabetesjournals.figshare.com/articles/dataset/_/24936975)
Supplement: Supplementary file 1 [file 1]

## ADDN Study Group Authors List for Journal Publication

**Australasian Diabetes Data Network (ADDN) Study Group**

**Date: 30 December 2023**

**Note:** Names to be removed from ADDN Study Group if included already as main authors.

| #  | Name                                             | Organization                                |
|----|--------------------------------------------------|---------------------------------------------|
| 1. | <b>Professor Maria Craig</b><br>Medical Director | The Children's Hospital at Westmead, Sydney |
| 2. | <b>Professor Peter Colman</b><br>ADDN PI         | The Royal Melbourne Hospital, Melbourne     |
| 3. | <b>A/Prof Sarah Glastras</b><br>ADDN PI          | Royal North Shore Hospital, Sydney          |
| 4. | <b>Clinical Professor Tim Jones</b><br>ADDN PI   | Perth Children's Hospital, Perth            |
| 5. | <b>Dr Stephanie Johnson</b><br>ADDN PI           | Queensland Children's Hospital, Brisbane    |
| 6. | <b>Professor Richard Sinnott</b><br>ADDN PI      | eResearch, University of Melbourne          |
| 7. | <b>Dr Anthony Zimmermann</b><br>ADDN PI          | Lyell McEwin Hospital, Elizabeth Vale       |
|    | <b>Dr Kym Anderson</b>                           | University Hospital Geelong, Geelong        |
|    | <b>A/Prof Sof Andrikopoulos</b>                  | Australian Diabetes Society (ADS)           |
|    | <b>Clinical Professor Geoff Ambler</b>           | The Children's Hospital at Westmead, Sydney |
|    | <b>Professor Jennifer Batch</b>                  | Queensland Children's Hospital, Brisbane    |
|    | <b>A/Prof Philip Bergman</b>                     | Monash Children's Hospital, Melbourne       |
|    | <b>A/Prof Justin Brown</b>                       | Monash Children's Hospital, Melbourne       |
|    | <b>Professor Fergus Cameron</b>                  | Royal Children's Hospital, Melbourne        |
|    | <b>A/Prof Louise Conwell</b>                     | Queensland Children's Hospital, Brisbane    |
|    | <b>A/Prof Andrew Cotterill</b>                   | Queensland Children's Hospital, Brisbane    |
|    | <b>Professor Jennifer Couper</b>                 | Women's and Children's Hospital, Adelaide   |
|    | <b>A/Prof Elizabeth Davis</b>                    | Perth Children's Hospital, Perth            |
|    | <b>Dr Martin de Bock</b>                         | Christchurch Hospital, New Zealand          |
|    | <b>Professor Kim Donaghue</b>                    | The Children's Hospital at Westmead, Sydney |
|    | <b>Dr Jan Fairchild</b>                          | Women's and Children's Hospital, Adelaide   |
|    | <b>Dr Gerry Fegan</b>                            | Fiona Stanley Hospital, Perth               |
|    | <b>Dr Spiros Furlanos</b>                        | The Royal Melbourne Hospital, Melbourne     |
|    | <b>Dr Peter Goss</b>                             | Geelong, Victoria                           |
|    | <b>Dr Leonie Gray</b>                            | Mater Medical Centre, Rockhampton           |
|    | <b>A/Prof Shane Hamblin</b>                      | Western Health, Melbourne                   |
|    | <b>Professor Paul Hofman</b>                     | University of Auckland, New Zealand         |
|    | <b>A/Prof Dianne Jane Holmes-Walker</b>          | Westmead Hospital, Sydney                   |
|    | <b>A/Prof Tony Huynh</b>                         | Queensland Children's Hospital, Brisbane    |

|  |                               |                                                                                      |
|--|-------------------------------|--------------------------------------------------------------------------------------|
|  | <b>Dr Steven James</b>        | University of the Sunshine Coast, Caboolture                                         |
|  | <b>A/Prof Craig Jefferies</b> | Starship Children's Health, New Zealand                                              |
|  | <b>Dr Jeff Kao</b>            | Royal Children's Hospital, Melbourne                                                 |
|  | <b>A/Prof Bruce R King</b>    | John Hunter Children's Hospital, Newcastle                                           |
|  | <b>Dr Antony Lafferty</b>     | The Canberra Hospital, Canberra                                                      |
|  | <b>Ms Michelle Martin</b>     | Illawarra Shoalhaven Diabetes Service, Wollongong                                    |
|  | <b>Dr Robert McCrossin</b>    | Gladstone Hospital, Gladstone                                                        |
|  | <b>Dr Kris Neville</b>        | Sydney Children's Hospital, Sydney                                                   |
|  | <b>Dr Mark Pascoe</b>         | Royal Hobart Hospital, Hobart                                                        |
|  | <b>Dr Ryan Paul</b>           | Waikato Hospital, New Zealand                                                        |
|  | <b>Dr Alexia Peña</b>         | The University of Adelaide, Adelaide                                                 |
|  | <b>Dr Liza Phillips</b>       | The Mater Private Hospital, Brisbane                                                 |
|  | <b>A/Prof Darrell Price</b>   | Pacific Private Clinic, Gold Coast                                                   |
|  | <b>A/Prof Christine Rodda</b> | Sunshine Hospital, Melbourne                                                         |
|  | <b>Prof David Simmons</b>     | Campbelltown Hospital, Sydney                                                        |
|  | <b>Dr Carmel Smart</b>        | John Hunter Children's Hospital, Newcastle                                           |
|  | <b>Dr Monique Stone</b>       | Royal North Shore Hospital, Sydney                                                   |
|  | <b>A/Prof Steve Stranks</b>   | Australian Diabetes Society                                                          |
|  | <b>Dr Elaine Tham</b>         | Women's and Children's Hospital, Adelaide                                            |
|  | <b>A/Prof Glenn Ward</b>      | St. Vincent's Hospital, Melbourne                                                    |
|  | <b>A/Prof Ben Wheeler</b>     | Dunedin School of Medicine, New Zealand                                              |
|  | <b>Dr Helen Woodhead</b>      | Australia and New Zealand Society for Paediatric Endocrinology and Diabetes (ANZPED) |

### **Alphabetical List, grouped names:**

Clinical Professor Geoff Ambler, Dr Kym Anderson, A/Prof Sof Andrikopoulos, ~~Dr Helen Barrett~~, Professor Jennifer Batch, A/Prof Philip Bergman, A/Prof Justin Brown (TBC if added), Professor Fergus Cameron, Professor Peter Colman, A/Prof Louise Conwell, A/Prof Andrew Cotterill, Professor Jennifer Couper, Professor Maria Craig, A/Prof Elizabeth Davis, Dr Martin de Bock, Professor Kim Donaghue, Dr Jan Fairchild, Dr Gerry Fegan, Dr Spiros Furlanos, A/Prof Sarah Glastras, Dr Peter Goss, Dr Leonie Gray, A/Prof Shane Hamblin, Professor Paul Hofman, A/Prof Dianne Jane Holmes-Walker, A/Prof Tony Huynh, Dr Steven James, A/Prof Craig Jefferies, Dr Stephanie Johnson, Clinical Professor Tim Jones, Dr Jeff Kao, A/Prof Bruce R King, Dr Antony Lafferty, Ms Michelle Martin, Dr Robert McCrossin, Dr Kris Neville, Dr Mark Pascoe, Dr Ryan Paul, Dr Alexia Peña, Dr Liza Phillips, A/Prof Darrell Price, A/Prof Christine Rodda, Prof David Simmons, Professor Richard Sinnott, Dr Carmel Smart, Dr Monique Stone, A/Prof Steve Stranks, Dr Elaine Tham, A/Prof Glenn Ward, A/Prof Ben Wheeler, Dr Helen Woodhead, Dr Anthony Zimmermann

## Alphabetical List, individual names:

- |                                             |                                  |
|---------------------------------------------|----------------------------------|
| 1. Clinical Professor Geoff Ambler          | 27. A/Prof Craig Jefferies       |
| 2. Dr Kym Anderson                          | 28. Dr Stephanie Johnson         |
| 3. A/Prof Sof Andrikopoulos                 | 29. Clinical Professor Tim Jones |
| 4. Professor Jennifer Batch                 | 30. Dr Jeff Kao                  |
| 5. A/Prof Philip Bergman                    | 31. A/Prof Bruce R King          |
| 6. A/Prof Justin Brown                      | 32. Dr Antony Lafferty           |
| 7. Professor Fergus Cameron                 | 33. Ms Michelle Martin           |
| 8. Professor Peter Colman                   | 34. Dr Robert McCrossin          |
| 9. A/Prof Louise Conwell                    | 35. Dr Kris Neville              |
| 10. A/Prof Andrew Cotterill                 | 36. Dr Mark Pascoe               |
| 11. Professor Jennifer Couper               | 37. Dr Ryan Paul                 |
| 12. Professor Maria Craig                   | 38. Dr Alexia Peña               |
| 13. A/Prof Elizabeth Davis                  | 39. Dr Liza Phillips             |
| 14. Dr Martin de Bock                       | 40. A/Prof Darrell Price         |
| 15. Professor Kim Donaghue                  | 41. A/Prof Christine Rodda       |
| 16. Dr Jan Fairchild                        | 42. Prof David Simmons           |
| 17. Dr Gerry Fegan                          | 43. Professor Richard Sinnott    |
| 18. Dr Spiros Furlanos                      | 44. Dr Carmel Smart              |
| 19. A/Prof Sarah Glastras                   | 45. Dr Monique Stone             |
| 20. Dr Peter Goss                           | 46. A/Prof Steve Stranks         |
| 21. Dr Leonie Gray                          | 47. Dr Elaine Tham               |
| 22. A/Prof Shane Hamblin                    | 48. A/Prof Glenn Ward            |
| 23. Professor Paul Hofman                   | 49. A/Prof Ben Wheeler           |
| 24. A/Prof Dianne <u>Jane</u> Holmes-Walker | 50. Dr Helen Woodhead            |
| 25. A/Prof Tony Huynh                       | 51. Dr Anthony Zimmerman         |
| 26. Dr Steven James                         |                                  |
