# Supplementary material
Source: publisher figshare collection journal article supplement (https://diabetesjournals.figshare.com/articles/dataset/_/24936975)
Supplement: Supplementary file 2 [file 1]

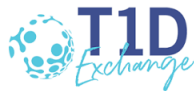

## **T1DX-QI List of Collaborative Centers and Principal Investigators**

|    | <b>Pediatric Type 1 Centers</b>                                                                          |
|----|----------------------------------------------------------------------------------------------------------|
| 1  | Barbara Davis Center for Childhood Diabetes, G. Todd Alonso, MD                                          |
| 2  | Baylor College of Medicine, Texas Children's Hospital, Daniel DeSalvo, MD                                |
| 3  | Children's Hospital of Los Angeles, Brian Miyazaki, MD                                                   |
| 4  | Children's Health, UT Southwestern, Abha Choudhary, MD                                                   |
| 5  | Children's Mercy Hospital, Mark Clements, MD, PhD                                                        |
| 6  | Children's National, Shideh Majidi, MD                                                                   |
| 7  | Cincinnati Children's Hospital Medical Center, Sarah Corathers, MD                                       |
| 8  | Cleveland Clinic, Andrea Mucci, MD                                                                       |
| 9  | Cook Children's Medical Center, Susan Hsieh, MD                                                          |
| 10 | Emory University, Children's Healthcare of Atlanta, Kristina Cossen, MD                                  |
| 11 | Hassenfeld Children's Hospital at NYU Langone, Mary Pat Gallagher, MD                                    |
| 12 | Indiana University Health, Tamara Hannon, MD                                                             |
| 13 | Johns Hopkins Hospital, Risa Wolf, MD                                                                    |
| 14 | Le Bonheur Children's Hospital, University of TN, Grace Bazan, MD                                        |
| 15 | Lurie Children's Hospital, Naomi Fogel, MD                                                               |
| 16 | Mount Sinai, Icahn School of Medicine, Meredith Wilkes, MD                                               |
| 17 | Nationwide Children's Hospital, Manmohan Kamboj, MD                                                      |
| 18 | Northwell Health, Cohen Children's Medical Center Jennifer Sarhis MD<br>and Allison Mekhoubad MD         |
| 19 | NYU Langone, Mineola, Long Island, Siham Accacha, MD                                                     |
| 20 | Oregon Health and Science University, Ines Guttmann-Bauman, MD                                           |
| 21 | Rady Children's Hospital, Carla Demeterco Berggren MD, PhD                                               |
| 22 | Seattle Children's Hospital, Faisal Malik MD, MSHS and Alissa Roberts MD                                 |
| 23 | Spectrum Health, Helen DeVos Children's Hospital, Donna Eng, MD                                          |
| 24 | Stanford Pediatrics, Lucille Packard Children's Hospital, Priya Prahalad, MD, PhD                        |
| 25 | SUNY Upstate Medical University, Joslin Diabetes, Roberto Izquierdo MD                                   |
| 26 | University of California Davis, Stephanie Crossen MD & Caroline Schulmeister, MD                         |
| 27 | University of California, San Francisco, Jenise Wong, MD, PhD                                            |
| 28 | University of Alabama at Birmingham, Mary Lauren Scott, MD                                               |
| 29 | University of Florida Diabetes Institute, Laura Jacobsen, MD                                             |
| 30 | University of Miami, Miller School of Medicine, Janine Sanchez, MD                                       |
| 31 | University of Michigan Hospitals-Michigan Medicine, C.S. Mott Children's Hospital,<br>Joyce Lee, MD, MPH |
| 32 | University of Pittsburgh Medical Center, Alissa Guarneri, MD, MBOE                                       |
| 33 | University of Utah, Intermountain Healthcare, Vandana Raman, MD                                          |
| 34 | University of Wisconsin, Liz Mann, MD                                                                    |
| 35 | Weill Cornell, Zoltan Antal, MD                                                                          |

| <b>Adult T1DX-QI Centers</b> |                                                                             |
|------------------------------|-----------------------------------------------------------------------------|
| 1                            | Barbara Davis Center for Diabetes, Halis Akturk, MD                         |
| 2                            | Boston Medical Center, Devin Steenkamp, MBChB                               |
| 3                            | Cleveland Clinic, Pratibha Rao, MD, MPH & Mary Vouyiouklis, MD              |
| 4                            | Albert Einstein College of Medicine, Shivani Agarwal, MD, MPH               |
| 5                            | Grady Memorial Hospital, Georgia Davis, MD                                  |
| 6                            | Johns Hopkins Hospital, Nestoras Mathioudakis, MD, MHS                      |
| 7                            | Mount Sinai, Icahn School of Medicine, Carol Levy, MD, CDCES                |
| 8                            | Northwestern Medicine, Grazia Aleppo, MD                                    |
| 9                            | NYU Langone, Lauren Golden, MD                                              |
| 10                           | Oregon Health and Science University, Andrew Ahmann, MD                     |
| 11                           | Penn Rodebaugh Diabetes Center, Penn Medicine, Ilona Lorincz, MD            |
| 12                           | Stanford Diabetes Clinic, Marina Basina, MD                                 |
| 13                           | SUNY Upstate Medical University, Joslin Diabetes, Ruth Weinstock, MD, PhD   |
| 14                           | University of California Davis, Prasanth Surampudi, MD                      |
| 15                           | University of California San Diego, Kristen Kulasa, MD                      |
| 16                           | University of California San Francisco, Umesh Masharani, MD                 |
| 17                           | University of Miami, Miller School of Medicine, Francesco Vendrame, MD, PhD |
| 18                           | University of Pittsburgh Medical Center, Jason Ng, MD & Margaret Zupa, MD   |
| 19                           | Washington University, Cynthia Herrick, MD                                  |
| 20                           | Wayne State University, Berhane Seyoum, MD, MPH                             |

| <b>Adult Type 2 Diabetes Centers</b> |                                                                                                    |
|--------------------------------------|----------------------------------------------------------------------------------------------------|
| 1                                    | Boston Medical Center, Kathryn Fantasia, MD                                                        |
| 2                                    | DiGiovanna Family Health & Wellness Group (DFHWC), Michael DiGiovanna, DO                          |
| 3                                    | Grady Memorial Hospital, Sonya Haw, MD and David Ziemer, MD                                        |
| 4                                    | Lundquist Institute for Biomedical Innovation at Harbor-UCLA Medical Center (TLI), Rajesh Garg, MD |
| 5                                    | Menocal Family Practice, Howard Haft, MD                                                           |
| 6                                    | Stanford Primary Care, Sandra Tsai, MD                                                             |
| 7                                    | SUNY Upstate Medical University, Joslin Diabetes, Ruth Weinstock, MD, PhD                          |
| 8                                    | University of Pittsburgh Medical Center, Jason Ng, MD and Margaret Zupa, MD                        |
| 9                                    | Valley Diabetes & Obesity, Gopika Gangupantula, MD                                                 |
